# Supplementary material
Source: Springer Nature journal article supplement (https://www.springermedizin.de/resource/supplementary/12872_2006_138_MOESM3_ESM.pdf/9431100)

**A**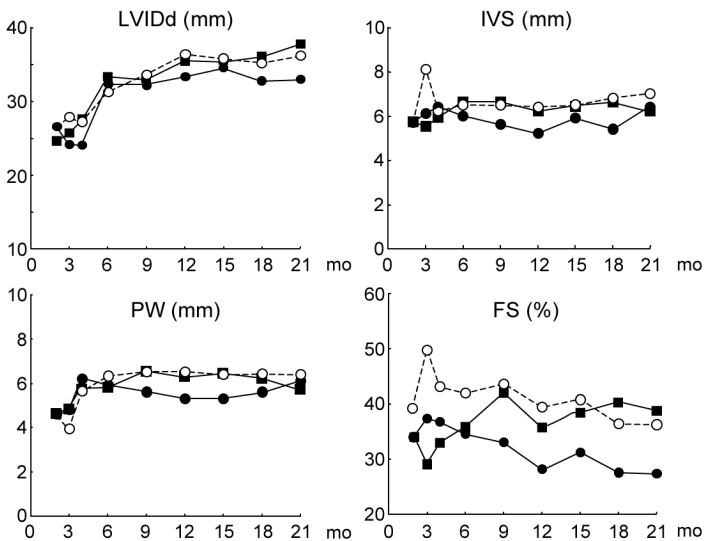**B**

Normal  
(III-301MN, 21 mo)

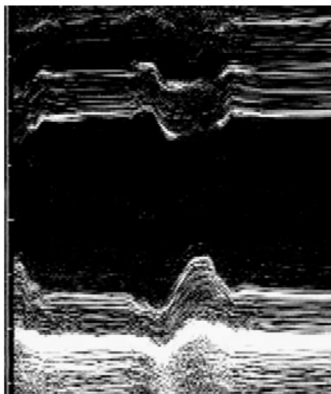

CXMD<sub>J</sub>  
(III-302MA, 21 mo)

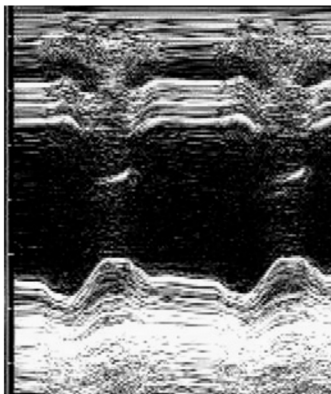

Supplement: MOESM3 [file 9431100]
